# Supplementary material
Source: PubMed Central journal article supplement (PMC3308200)
Supplement: es204611h_si_001.pdf [file es204611h_si_001.pdf]

Supporting information to  
“Significance of xenobiotic metabolism for  
bioaccumulation kinetics of organic chemicals in  
*Gammarus pulex*”

Roman Ashauer\*<sup>†</sup>, Anita Hintermeister<sup>†</sup>, Isabel O'Connor<sup>†‡</sup>, Maline Elumelu<sup>†</sup>,

Juliane Hollender<sup>°†</sup>, Beate I. Escher<sup>†§</sup>

<sup>†</sup> Eawag, Swiss Federal Institute of Aquatic Science and Technology, 8600  
Dübendorf, Switzerland

<sup>‡</sup> Radboud University, Nijmegen, The Netherlands

<sup>§</sup> The University of Queensland, National Research Centre for Environmental  
Toxicology (Entox), 39 Kessels Rd, Brisbane, Qld 4108, Australia

<sup>°</sup>Institute of Biogeochemistry and Pollutant Dynamics, ETH Zürich, Switzerland

\* Corresponding author: phone: +41-587655233; fax: +41-587655311;  
E-mail: [roman.ashauer@eawag.ch](mailto:roman.ashauer@eawag.ch)

Table of contents

|                                                                                                                       |    |
|-----------------------------------------------------------------------------------------------------------------------|----|
| Text SI-1: Sources of <sup>14</sup> C-labeled material.....                                                           | 2  |
| Text SI-2: Details on metabolite screening tests.....                                                                 | 2  |
| Text SI-3: Details on biotransformation kinetics experiments .....                                                    | 4  |
| Text SI-4: Quantification of aqueous concentrations .....                                                             | 8  |
| Text SI-5: Extraction method for HPLC with radio and UV detector.....                                                 | 8  |
| Text SI-6: Identification of metabolites in organisms .....                                                           | 9  |
| HPLC method with radiodetector and UV detector.....                                                                   | 9  |
| Sample processing and extraction method for Orbitrap .....                                                            | 9  |
| Details of the HPLC-ESI-LTQ-Orbitrap MS method.....                                                                   | 10 |
| Text SI-7: Contribution of dietary uptake.....                                                                        | 10 |
| Quantification of amount adsorbed to leaf material .....                                                              | 10 |
| Calculation of dietary uptake .....                                                                                   | 11 |
| Text SI-8: Instability of ethylacrylate during extraction and analysis.....                                           | 13 |
| Text SI-9: Comparison with study based on total <sup>14</sup> C internal concentrations (details<br>to Figure 5)..... | 14 |
| Additional References in Supporting Information.....                                                                  | 15 |

## Text SI-1: Sources of <sup>14</sup>C-labeled material

The <sup>14</sup>C-labelled chlorpyrifos, pentachlorophenol, carbaryl, malathion, aldicarb, carbofuran, imidacloprid were supplied by the Institute of Isotopes, Budapest, Hungary. 2,4-dichloroaniline, 2,4-dichlorophenol, 1,2,3-trichlorobenzene, 4,6-dinitro-o-cresol, 2,4,5-trichlorophenol, ethylacrylate, 4-nitrobenzyl-chloride were supplied by American Radiolabeled Chemicals, St. Louis, USA. Sea-nine (4,5-Dichloro-2-octyl-3-isothiazolone) was supplied by Amersham (GE Healthcare), UK.

Unlabelled material of these compounds was of analytical grade and purchased from Sigma-Aldrich, Buchs, Switzerland, except for Sea-Nine (>97% purity, Rohm and Haas), which was a gift of Christ Chemie AG, Rheinach, Switzerland.

## Text SI-2: Details on metabolite screening tests

Limits of detection in aqueous samples were calculated as:  $LOD = \text{mean counts of blanks} + 3 \times \text{standard deviation of blanks}$ . The minimum detectable amount (MDA) for concentrations in tissue samples of *Gammarus pulex* using HPLC analysis with radio-detector was calculated according to <sup>2</sup> for each peak. The MDA depends on the peak width and is approximately a factor of three lower for peaks of 0.5 min width compared to peaks of 1.5 min width. Here we give exemplary MDAs for peaks of 1 min width and calculate the corresponding limit of quantification using the average mass of *Gammarus pulex* material in the samples of the metabolite screening test.

Table S1: Limits of detection and quantification, number and mass of *Gammarus pulex* in samples of metabolite screening tests.

| Test compound          | Number of <i>Gammarus pulex</i> per sample | Mean sample wet weight | MDA in samples of <i>Gammarus pulex</i> in radio-HPLC | MDA in samples of <i>Gammarus pulex</i> in radio-HPLC | Recovery of extraction method (measured with LSC) | Overall recovery of spiked parent compound (measured with HPLC) | LOQ corrected for overall recovery | Total internal concentration expected after 24h <sup>a)</sup> | Factor of expected total C <sub>internal</sub> to LOQ | Average C <sub>w</sub> (mean of 0h and 24h) |
|------------------------|--------------------------------------------|------------------------|-------------------------------------------------------|-------------------------------------------------------|---------------------------------------------------|-----------------------------------------------------------------|------------------------------------|---------------------------------------------------------------|-------------------------------------------------------|---------------------------------------------|
|                        | #                                          | mg                     | dpm                                                   | nmol / g <sub>wet</sub> weight                        | %                                                 | %                                                               | nmol / g <sub>wet</sub> wet weight | nmol / g <sub>wet</sub> weight                                | -                                                     | nmol / mL                                   |
| 1,2,3-Trichlorobenzene | 4                                          | 109.46                 | 87.00                                                 | 2.81                                                  | 43                                                | 37                                                              | 7.59                               | 130.89                                                        | 17                                                    | 0.701                                       |
| 2,4,5-Trichlorophenol  | 4                                          | 146.41                 | 74.60                                                 | 0.50                                                  | 102                                               | 95                                                              | 0.53                               | 296.13                                                        | 563                                                   | 0.185                                       |
| 2,4-Dichloroaniline    | 4                                          | 118.19                 | 74.30                                                 | 1.27                                                  | 74                                                | 66                                                              | 1.92                               | 239.90                                                        | 125                                                   | 4.758                                       |
| 2,4-Dichlorophenol     | 4                                          | 106.84                 | 89.50                                                 | 0.82                                                  | 94                                                | 93                                                              | 0.88                               | 1047.02                                                       | 1187                                                  | 1.251                                       |
| 4,6-Dinitro-o-cresol   | 4                                          | 130.91                 | 72.70                                                 | 2.23                                                  | 108                                               | 106                                                             | 2.10                               | 8.62                                                          | 4                                                     | 0.350                                       |
| 4-Nitrobenzyl-chloride | 4                                          | 144.48                 | 70.90                                                 | 5.17                                                  | 96                                                | 84                                                              | 6.15                               | 695.79                                                        | 113                                                   | 3.943                                       |
| Aldicarb               | 4                                          | 168.46                 | 79.80                                                 | 0.06                                                  | 97                                                | 92                                                              | 0.07                               | 0.54                                                          | 8                                                     | 0.333                                       |
| Carbaryl               | 4                                          | 207.31                 | 69.80                                                 | 0.05                                                  | 101                                               | 88                                                              | 0.06                               | 1.31                                                          | 23                                                    | 0.064                                       |
| Carbofuran             | 8                                          | 258.92                 | 82.20                                                 | 0.02                                                  | 97                                                | 93                                                              | 0.02                               | 0.20                                                          | 9                                                     | 0.022                                       |
| Chlorpyrifos           | 4                                          | 173.23                 | 62.60                                                 | 0.06                                                  | 98                                                | 35                                                              | 0.17                               | 1.20                                                          | 7                                                     | 0.002                                       |
| Ethylacrylate          | 4                                          | 125.15                 | 70.50                                                 | 1.49                                                  | 2                                                 | 3                                                               | 49.67                              | 874.94                                                        | 18                                                    | 13.444                                      |
| Imidacloprid           | 4                                          | 144.94                 | 77.30                                                 | 0.07                                                  | 104                                               | 107                                                             | 0.07                               | 0.59                                                          | 9                                                     | 0.341                                       |
| Malathion              | 8                                          | 320.18                 | 84.50                                                 | 0.02                                                  | 91                                                | 77                                                              | 0.03                               | 0.13                                                          | 5                                                     | 0.002                                       |
| Pentachlorophenol      | 4                                          | 198.2                  | 63.70                                                 | 0.13                                                  | 99                                                | 96                                                              | 0.14                               | 5.44                                                          | 40                                                    | 0.130                                       |
| Sea-nine               | 4                                          | 147.56                 | 81.90                                                 | 0.01                                                  | 79                                                | 45                                                              | 0.02                               | 12.84                                                         | 578                                                   | 0.011                                       |

a) Total expected internal concentration is calculated using the average concentration in water C<sub>w</sub>:  $C_{\text{internal, total}} = k_{\text{in}} / k_{\text{out}} \times C_w \times (1 - e^{-k_{\text{out}} \times t})$  and the parameters  $k_{\text{in}}$  and  $k_{\text{out}}$  from toxicokinetic studies where total radioactivity was measured in *Gammarus pulex* for these compounds <sup>3-5</sup>.

### Text SI-3: Details on biotransformation kinetics experiments

The number of organisms per beaker, average weight and age, collection dates and acclimatization times for each experiment can be found in Table S2. Information on dosing and solvents can be found in Table S3 and the measured oxygen, pH and conductivity are listed in Table S4.

Table S2: Additional information on the test organisms in the biotransformation kinetics experiments

| Experiment             | Start date of experiment | Collection of <i>Gammarus pulex</i> | Acclimatization time between collection and experiment (days) | Average wet weight of sample (mg) | Standard deviation (mg) | Number of organisms per sample | Average wet weight of <i>Gammarus pulex</i> (mg) | Age <sup>a</sup> for average wet weight (days) | Number of organisms per beaker at start of experiment |
|------------------------|--------------------------|-------------------------------------|---------------------------------------------------------------|-----------------------------------|-------------------------|--------------------------------|--------------------------------------------------|------------------------------------------------|-------------------------------------------------------|
| 2,4,5-Trichlorophenol  | 16-Jun-10                | 09-Jun-10                           | 7                                                             | 186.71                            | 24.37                   | 4                              | 46.68                                            | 254                                            | 15                                                    |
| 2,4-Dichloroaniline    | 16-Feb-10                | 05-Feb-10                           | 11                                                            | 176.70                            | 31.57                   | 4                              | 44.18                                            | 241                                            | 10                                                    |
| 2,4-Dichlorophenol     | 01-Jun-10                | 27-May-10                           | 5                                                             | 191.04                            | 26.22                   | 4                              | 47.76                                            | 260                                            | 15                                                    |
| 4-Nitrobenzyl-chloride | 16-Feb-10                | 05-Feb-10                           | 11                                                            | 205.09                            | 76.60                   | 4                              | 51.27                                            | 285                                            | 10                                                    |
| Aldicarb               | 16-Feb-10                | 05-Feb-10                           | 11                                                            | 187.44                            | 46.76                   | 4                              | 46.86                                            | 255                                            | 10                                                    |
| Carbaryl               | 06-Jul-10                | 02-Jul-10                           | 4                                                             | 144.29                            | 26.35                   | 4                              | 36.07                                            | 210                                            | 15                                                    |
| Carbofuran             | 16-Jun-10                | 09-Jun-10                           | 7                                                             | 313.62                            | 39.34                   | 8                              | 39.20                                            | 221                                            | 20                                                    |
| Chlorpyrifos           | 06-Jul-10                | 02-Jul-10                           | 4                                                             | 294.09                            | 57.90                   | 8                              | 36.76                                            | 212                                            | 20                                                    |
| Ethylacrylate          | 01-Jun-10                | 27-May-10                           | 5                                                             | 194.51                            | 24.51                   | 4                              | 48.63                                            | 266                                            | 15                                                    |
| Malathion              | 16-Jun-10                | 09-Jun-10                           | 7                                                             | 335.84                            | 47.91                   | 8                              | 41.98                                            | 232                                            | 20                                                    |
| Pentachlorophenol      | 06-Jul-10                | 02-Jul-10                           | 4                                                             | 152.99                            | 30.27                   | 4                              | 38.25                                            | 217                                            | 15                                                    |
| Sea-nine               | 01-Jun-10                | 27-May-10                           | 5                                                             | 203.17                            | 33.89                   | 4                              | 50.79                                            | 281                                            | 15                                                    |

<sup>a</sup> Average age of *Gammarus pulex* calculated from the average wet weight after <sup>6</sup> under the assumption of equal proportions of males and females.

Table S3: Solvents and dosing in the biotransformation kinetics experiments.

| Compound               | Solvent                  | Percentage of solvent in test solution at start of experiment (v/v) |
|------------------------|--------------------------|---------------------------------------------------------------------|
| 2,4,5-Trichlorophenol  | methanol                 | 0.024                                                               |
| 2,4-Dichloroaniline    | acetone                  | 0.171                                                               |
| 2,4-Dichlorophenol     | acetone                  | 0.105                                                               |
| 4-Nitrobenzyl-chloride | acetone/methanol (40:60) | 0.125                                                               |
| Aldicarb               | acetone                  | 0.140                                                               |
| Carbaryl               | methanol                 | 0.014                                                               |
| Carbofuran             | acetone                  | 0.007                                                               |
| Chlorpyrifos           | methanol                 | 0.003                                                               |
| Ethylacrylate          | acetone/methanol (65:35) | 0.290                                                               |
| Malathion              | acetone                  | 0.001                                                               |
| Pentachlorophenol      | methanol                 | 0.015                                                               |
| Sea-nine               | methanol                 | 0.005                                                               |

Table S4: Oxygen, pH and conductivity in the biotransformation kinetics experiments.

| Compound               | O <sub>2</sub> [mg / L] | SD   | pH   | SD   | conductivity [ $\mu$ S / cm] | SD | n |
|------------------------|-------------------------|------|------|------|------------------------------|----|---|
| 2,4,5-Trichlorophenol  | 3.11                    | 1.55 | 6.89 | 0.15 | 644                          | 9  | 8 |
| 2,4-Dichloroaniline    | 7.68                    | 2.38 | 7.14 | 0.13 | 574                          | 6  | 8 |
| 2,4-Dichlorophenol     | 3.90                    | 0.83 | 6.96 | 0.12 | 592                          | 14 | 7 |
| 4-Nitrobenzyl-chloride | 7.35                    | 2.76 | 7.13 | 0.23 | 577                          | 6  | 8 |
| Aldicarb               | 6.98                    | 1.35 | 7.20 | 0.12 | 575                          | 5  | 8 |
| Carbaryl               | 4.16                    | 0.54 | 7.03 | 0.12 | 588                          | 19 | 7 |
| Carbofuran             | 2.40                    | 0.78 | 6.85 | 0.11 | 646                          | 7  | 8 |
| Chlorpyrifos           | 3.24                    | 0.98 | 7.05 | 0.22 | 594                          | 9  | 7 |
| Ethylacrylate          | 4.05                    | 0.57 | 7.03 | 0.25 | 592                          | 8  | 7 |
| Malathion              | 2.65                    | 0.95 | 6.96 | 0.03 | 644                          | 6  | 8 |
| Pentachlorophenol      | 3.88                    | 0.96 | 7.02 | 0.17 | 582                          | 6  | 7 |
| Sea-nine               | 3.90                    | 0.65 | 7.01 | 0.20 | 600                          | 6  | 7 |

Table S5: Initial concentrations in biotransformation kinetics experiments related to toxicity.

|                        | C <sub>water</sub> (at time 0) | 24h-LC50 <sup>a)</sup> | Factor between initial C <sub>water</sub> and 24h-LC50 |
|------------------------|--------------------------------|------------------------|--------------------------------------------------------|
|                        | nmol/L                         | nmol/L                 |                                                        |
| 2,4,5-Trichlorophenol  | 25.75                          | >2930                  | 114                                                    |
| 2,4-Dichloroaniline    | 5760                           | 57896                  | 10.1                                                   |
| 2,4-Dichlorophenol     | 1652                           | 22112                  | 13.4                                                   |
| 4-Nitrobenzyl-chloride | 4831                           | > 30111                | 6.2                                                    |
| Aldicarb               | 424                            | 3461                   | 8.2                                                    |
| Carbaryl               | 66.33                          | 144.12                 | 2.2 <sup>b)</sup>                                      |
| Carbofuran             | 21.03                          | 82.44                  | 3.9                                                    |
| Ethylacrylate          | 12893                          | > 70248                | 5.4                                                    |
| Chlorpyrifos           | 7.19                           | 9.69                   | 1.3 <sup>b)</sup>                                      |
| Malathion              | 1.4                            | > 3.84                 | 2.7                                                    |
| Pentachlorophenol      | 29.9                           | 21026                  | 703 <sup>b)</sup>                                      |
| Sea-nine               | 15.5                           | 122.9                  | 7.9                                                    |

a) From references<sup>7-9</sup>.

b) Note that these are 48h-LC50 values, whereas exposure in the biotransformation kinetics experiment was for 24h only.

## **Text SI-4: Quantification of aqueous concentrations**

Sample processing and quantification of radioactivity in aqueous samples is identical to previous studies <sup>1,5</sup>: Aqueous samples were analyzed immediately by adding 10 mL Ecoscint A scintillation cocktail (National Diagnostics, UK) and counting of radioactivity three times for 10 min on a Packard (Tri-Carb 2200CA, Packard, USA) scintillation counter (LSC). Counts were corrected for background activities using control samples. Color quenching and counting efficiency were corrected using the reverse spectrum transform method and the efficiency tracing technique as implemented in the Packard Tri-Carb 2200 CA based on a built-in external standard <sup>2</sup>. Counts were converted to moles using the known specific activities of the test compounds together with the mixing ratio in case of dosing with mixtures of unlabelled and labeled test compound.

## **Text SI-5: Extraction method for HPLC with radio and UV detector**

The extraction method for analysis of *Gammarus pulex* samples using HPLC with a radio- and a UV-detector follows closely the method developed in <sup>1</sup>, with slight modifications for each compound as detailed in tables S3 and S6.

Frozen samples of *Gammarus pulex* were ground with a glass rod after the addition of 1 mL methanol. Another 2.5 mL of methanol were used to rinse the glass rod and added to the sample material. Samples were sonicated in an ultrasonic bath for 3 min and the homogenate filtered (Minisart, 26 mm, pore size: 0.2 µm, hydrophilic, cellulose-, acetate- and surfactant-free membrane). Glass tubes, syringes and filters were rinsed twice with 2 mL methanol which was added to the samples. The sample filtrate was concentrated to about 1 mL at 60°C using a GeneVac (EZ-2 PLUS, Genevac, UK). In a final concentration step the samples were concentrated under nitrogen flow to 90 µL and 210 µL of distilled water were added to obtain a ratio of 30/70 (v/v) methanol to water.

For carbofuran and malathion the method was slightly modified. To achieve sufficient radioactivity two of the four samples from each sampling time were combined, tubes rinsed twice with 1 mL methanol and the combined samples concentrated again to about 1 mL. Hence the final two samples per sampling time comprised a total of eight *Gammarus pulex* per sample. Recovery and extraction efficiency for pooled samples of more than four organisms were insufficient; therefore the samples were extracted separately and combined during the concentration step.

Subsequently samples were split into two aliquots. 100 µL were analyzed by LSC after adding 10 mL Ecoscint A scintillation cocktail and another 100 µL were analyzed by HPLC (HP 1100, Agilent) with a radio-detector (500 TR, Packard) to quantify amounts of parent compound and metabolites (HPLC method in table S6).

Metabolites as well as the parent compound were identified by spiking unlabelled standard material of these to samples of control organisms during the grinding step



and identification of these peaks via UV-detection. Peaks with the same retention time in the chromatogram of the UV-detector and the radio-detector were assumed to originate from identical compounds.

In order to determine the recovery of the extraction method blank organism samples were spiked with a known amount of parent compound at the beginning of the extraction method. Comparison of the spiked radioactivity with the radioactivity measured by LSC yields the recovery of the extraction steps and comparison with the radioactivity measured on the HPLC yields the overall recovery (Table S1).

## Text SI-6: Identification of metabolites in organisms

### ***HPLC method with radiodetector and UV detector***

Column: Nucleodur C18 Gravity (125x2x5)

Solvent A: Water with 0.1% acetic acid

Solvent B: Methanol with 0.1% acetic acid

Table S6: Details of HPLC method used in metabolite screening tests.

| Test compound          | Time                 | % solvent B    |
|------------------------|----------------------|----------------|
| 1,2,3-Trichlorobenzene | 0-8-17-17.5-22.91    | 40-90-90-40-40 |
| 2,4,5-Trichlorophenol  | 0-9-17-17.5-22.91    | 30-90-90-30-30 |
| 2,4-Dichloroaniline    | 0-10-17-17.5-22.91   | 5-90-90-5-5    |
| 2,4-Dichlorophenol     | 0-10-17-17.5-22.91   | 20-90-90-20-20 |
| 4,6-Dinitro-o-cresol   | 0-10-17-17.5-22.91   | 30-90-90-30-30 |
| 4-Nitrobenzyl-chloride | 0-11-17-17.5-22.91   | 20-90-90-20-20 |
| Aldicarb               | 0-10-17-17.5-23      | 5-90-90-5-5    |
| Carbaryl               | 0-11-17-17.5-22.91   | 10-90-90-10-10 |
| Carbofuran             | 0-11-17-17.5-23.13   | 5-90-90-5-5    |
| Chlorpyrifos           | 0-6.5-17-17.5-22.91  | 30-90-90-30-30 |
| Ethylacrylate          | 0-11-17-17.5-22.91   | 5-70-70-5-5    |
| Imidacloprid           | 0-11.5-17-17.5-22.91 | 5-55-90-5-5    |
| Malathion              | 0-10-17-17.5-23.13   | 10-90-90-10-10 |
| Pentachlorophenol      | 0-5.8-17-17.5-22.91  | 30-90-90-30-30 |
| Sea-nine               | 0-7-17-17.5-22.91    | 40-90-90-40-40 |

### ***Sample processing and extraction method for Orbitrap***

In case the parent compound could not be detected in the pure or diluted *G. pulex* extract using HPLC-ESI-MS the extract was purified by solid phase extraction. Therefore the extract was diluted with acidified water (0.1 % acetic acid) to a methanol percentage of 5 % and passed through a preconditioned Isolute ENV+ SPE cartridge (Separtis GmbH, Germany). After washing with 2 mL 0.1 % acetic acid, the elution was carried out with 4 mL of methanol. The methanol extract was concentrated under nitrogen flow and diluted with distilled water to obtain a ratio of 30/70 (v/v) methanol to water prior HPLC analysis.

## ***Details of the HPLC-ESI-LTQ-Orbitrap MS method***

The HPLC system consisted of a quaternary pump of type Rheos 2200 from Flux Instruments (Basel, Switzerland) and a HTS PAL autosampler of CTC Analytics AG (Zwingen, Switzerland). Samples of 60  $\mu$ L extract or diluted extract were injected into the HPLC system with the same column and the same HPLC gradient as for the method with radio-detection (see above). Detection with the LTQ-Orbitrap mass spectrometer (Thermo, Waltham, MA) was conducted after electrospray ionization in either positive or negative mode. Parameters adjusted for the ion source ESI were source voltage (4.5 kV) and capillary temperature (275°C). The mass spectrometry experiment consisted of a full-scan (resolution set to 60000) within the mass-to-charge range 115-1000 or 50 - 690 and MSMS experiments triggered when peaks were detected in the full-scan at the exact masses of the precursor ion for the parent compound, possible transformation products (two generations predicted by UMPPS, the University of Minnesota Pathway Prediction System, <http://umbbd.msi.umn.edu/predict/aboutPPS.html>) or the most intense ion. After transfer from the ion trap, fragmentation was achieved with higher energy collision dissociation (HCD) and fragments were detected in the Orbitrap with a resolution of 7500. External mass calibration was used to ensure a mass accuracy of < 5 ppm. Data were analyzed with Xcalibur (Thermo Scientific, USA) and parent compounds were identified with reference standards using retention time and exact masses as criteria.

## **Text SI-7: Contribution of dietary uptake**

After the first 24h of exposure in the biotransformation kinetics experiments (end of exposure phase) leaf material was sampled, blotted dry, weighed and frozen at -20°C until analysis or analyzed immediately.

### ***Quantification of amount adsorbed to leaf material***

The amount of test chemicals adsorbed to the leaf material (food) was measured after the exposure phase by sequential extraction with 10 mL of Ecoscint A scintillation cocktail (National Diagnostics, UK) or Soluene-350 and Hionic-Fluor (Aldicarb and 4-Nitrobenzyl-chloride). The extractions were repeated until only a negligible amount remained on the leaf discs (< 5%). Radioactivity counts from all extractions were combined.

Radioactivity was counted three times for 10 min on a Packard (Tri-Carb 2200CA, Packard, USA) scintillation counter (LSC). Counts were corrected for background activities using control samples. Color quenching and counting efficiency were corrected using the reverse spectrum transform method and the efficiency tracing technique as implemented in the Packard Tri-Carb 2200 CA based on a built-in external standard 2. Counts were converted to moles using the known specific

activities of the test compounds together with the mixing ratio in case of dosing with mixtures of unlabelled and labeled test compound.

As it was not possible to “spike” leaf discs mimicking adsorption we could not quantify the recovery of our extraction and quantification method for compound concentrations on leaf material.

### ***Calculation of dietary uptake***

The mean concentration on the leaf material during the exposure phase was multiplied with an assimilation efficiency of 0.4 (approximated based on the review by Wang & Fisher<sup>10</sup>) and an average daily feeding rate<sup>11</sup> to estimate total uptake of the test compound via food. The uptake via food was then compared to the uptake via water during the same period and the relative contribution of dietary uptake to total uptake calculated for each compound (Table S7).

Table S7: Concentrations on leaf material in biotransformation kinetics experiments and approximate contribution of dietary uptake relative to total uptake.

|                        | $C_{\text{leaf}}$<br>(at 24h)                  | SD    | n  | Apparent <sup>a)</sup><br>$K_{\text{leaf-water}}$ | $C_{\text{water}}$ (at<br>time 0) | Extraction and scintillation<br>cocktail | Dietary uptake<br><sup>b)</sup> | Uptake from<br>water <sup>c)</sup> | Dietary<br>uptake in %<br>of total<br>uptake |
|------------------------|------------------------------------------------|-------|----|---------------------------------------------------|-----------------------------------|------------------------------------------|---------------------------------|------------------------------------|----------------------------------------------|
|                        | pmol $\square$ g <sub>leaf</sub> <sup>-1</sup> |       |    |                                                   | nmol/L                            |                                          | pmol $\square$ d <sup>-1</sup>  | pmol $\square$ d <sup>-1</sup>     | %                                            |
| 2,4,5-Trichlorophenol  | 1082                                           | 260   | 8  | 42                                                | 25.75                             | EcoScint A                               | 2.53                            | 1670                               | 0.15                                         |
| 2,4-Dichloroaniline    | 35474                                          | 13873 | 8  | 6                                                 | 5760                              | EcoScint A                               | 78.4                            | 74562                              | 0.10                                         |
| 2,4-Dichlorophenol     | 15518                                          | 1652  | 8  | 9                                                 | 1652                              | EcoScint A                               | 37.1                            | 57044                              | 0.06                                         |
| 4-Nitrobenzyl-chloride | 17783                                          | 6031  | 8  | 4                                                 | 4831                              | Soluene-350 and Hionic-Fluor             | 45.6                            | 142667                             | 0.03                                         |
| Aldicarb               | 184.6                                          | 40.8  | 5  | 0.4                                               | 424                               | Soluene-350 and Hionic-Fluor             | 0.43                            | 196                                | 0.22                                         |
| Carbaryl               | 2801                                           | 748   | 8  | 42                                                | 66.33                             | EcoScint A                               | 5.05                            | 56.0                               | 8.28                                         |
| Carbofuran             | 110.7                                          | 17.1  | 10 | 5                                                 | 21.03                             | EcoScint A                               | 0.22                            | 4064                               | 0.01                                         |
| Chlorpyrifos           | 1191                                           | 350   | 10 | 166                                               | 7.19                              | EcoScint A                               | 2.19                            | 396                                | 0.55                                         |
| Ethylacrylate          | 14236                                          | 3470  | 8  | 1                                                 | 12893                             | EcoScint A                               | 34.6                            | 75301                              | 0.05                                         |
| Malathion              | 24.6                                           | 10.3  | 10 | 18                                                | 1.4                               | EcoScint A                               | 0.05                            | 0.52                               | 9.02                                         |
| Pentachlorophenol      | 1224                                           | 372   | 8  | 41                                                | 29.9                              | EcoScint A                               | 2.34                            | 739                                | 0.32                                         |
| Sea-nine               | 321.7                                          | 66    | 8  | 21                                                | 15.5                              | EcoScint A <sup>d)</sup>                 | 0.82                            | 272                                | 0.30                                         |

a)  $K_{\text{leaf-water}} = C_{\text{leaf}} / C_{\text{water}}$

b) Dietary uptake =  $0.5 \times (C_{\text{leaf}, 0\text{h}} + C_{\text{leaf}, 24\text{h}}) \times \text{AE} \times \text{FR} \times \text{Mass}_{G.\text{pulex}}$ ,

where the Assimilation Efficiency:  $\text{AE} = 0.4$ , approximated based on the review by Wang & Fisher (1999)<sup>10</sup>,

and the Feeding Rate:  $\text{FR} = 0.25 \text{ g leaf} / (\text{day} \times \text{g wet weight } G.\text{pulex})$  based on Maltby et al. (2002)<sup>11</sup>,

and  $C_{\text{leaf}, 0\text{h}} = 0$ .

c) Uptake from water =  $C_{\text{water}} \times k_{\text{in}} \times \text{Mass}_{G.\text{pulex}}$ , where  $k_{\text{in}}$  for ethylacrylate was taken from Ashauer et al. (2010)<sup>5</sup>

d) Deviation from experimental protocol: leaf material was not blotted dry before analysis.

## **Text SI-8: Instability of ethylacrylate during extraction and analysis**

Recovery of ethylacrylate was very low, although the expected concentration (Table S1) was still 18 times higher than the LOD. However, the chromatograms of samples spiked with ethylacrylate exhibited three ill-defined peaks, which we attribute to reaction of ethylacrylate with methanol during the sample preparation (these peaks were not present in chromatograms of the parent stock solution). Thus abiotic transformation of ethylacrylate is so strong, that the additional biotransformation can not be quantified. It is possible that ethylacrylate is biotransformed in *G. pulex*, but biotransformation products and the products of abiotic hydrolysis are presumably very similar, preventing us from identifying and quantifying the biotransformation products of ethylacrylate.

## Text SI-9: Comparison with study based on total <sup>14</sup>C internal concentrations (details to Figure 5)

The uptake rate constants based on the two different methods correlate within one order of magnitude variability (top left). For the uptake rate constants the regressions' slope (Deming type II, log transformed data) was not significantly different from 1 and intercept with the y-axis was not significantly different from 0 (Figure 5a, regression not plotted). This comparison also includes the uptake rate constant for diazinon<sup>1</sup> and excludes the uptake rate constants for carbaryl and 4-nitrobenzyl-chloride, because uptake rate constants for these two compounds were kept fixed to the previously measured, total <sup>14</sup>C-based values in this study.

Elimination rate constants from this study were those of parent compounds. For the elimination rate constants the regression's slope (Deming type II) was not significantly different from zero (i.e. no relationship). This comparison also includes data for diazinon<sup>1</sup> and excludes carbofuran and 2,4-dichlorophenol due to high uncertainty (Figure 5b, regression not plotted).

For  $BAF_{total}$  values from the two studies with the different methods the regressions' slope (Deming type II, log transformed data) was not significantly different from 1 and intercept with the y-axis was not significantly different from 0 (Figure 5c, regression not plotted).

The regression of  $BAF_{total}$  from the total <sup>14</sup>C-study vs. the  $BAF_{parent}$  from this study has an intercept with the y-axis of 0.8 (on log scale, Figure 5d, regression not plotted). Thus the  $BAF_{total}$  from the total <sup>14</sup>C-study and the  $BAF_{parent}$  from this study are correlated, but the  $BAF_{total}$  from the total <sup>14</sup>C-study is nearly one order of magnitude higher than the  $BAF_{parent}$  from this study (y-intercept = 0.8, slope = 1.0), because in the former the metabolites are also counted towards the total radioactivity.

Table S8: Comparison of bioaccumulation factors.

| Parent compound        | $BAF_{total}$<br>total <sup>14</sup> C study | $BAF_{parent}$<br>this study | $BAF_{parent} + \sum MEF_{Mi}$<br>this study |
|------------------------|----------------------------------------------|------------------------------|----------------------------------------------|
|                        | [L/kg wet weight]                            | [L/kg wet weight]            | [L/kg wet weight]                            |
| Aldicarb               | 1.64                                         | 0.87                         | 1.2                                          |
| Carbaryl               | 86.67                                        | 4.163                        | 157                                          |
| Malathion              | 114.30                                       | 2.96                         | 8                                            |
| 4-nitrobenzyl-chloride | 184.56                                       | 4.84                         | 157                                          |
| 2,4-dichloroaniline    | 55.73                                        | 29.32                        | 109                                          |
| Sea-nine               | 1732.14                                      | 271.96                       | 660                                          |
| Diazinon               | 82.07                                        | 12.76                        | 81                                           |
| 2,4,5-trichlorophenol  | 2635.29                                      | 82.30                        | 1645                                         |
| Pentachlorophenol      | 50.57                                        | 202.18                       | 520                                          |

## Additional References in Supporting Information

- (1) Ashauer, R.; Hintermeister, A.; Caravatti, I.; Kretschmann, A.; Escher, B. I., Toxicokinetic-toxicodynamic modeling explains carry-over toxicity from exposure to diazinon by slow organism recovery. *Environ. Sci. Technol.* **2010**, *44*, (10), 3963-3971.
- (2) Packard, *Operation Manual. Tri-Carb Liquid Scintillation Analyzers Models 2200 CA and 2250 CA*. Packard Instrument Company: Downers Grove, IL, USA, 1987.
- (3) Ashauer, R.; Boxall, A.; Brown, C., Uptake and elimination of chlorpyrifos and pentachlorophenol into the freshwater amphipod *Gammarus pulex*. *Arch. Environ. Contam. Toxicol.* **2006**, *51*, (4), 542-548.
- (4) Ashauer, R.; Boxall, A. B. A.; Brown, C. D., Simulating toxicity of carbaryl to *Gammarus pulex* after sequential pulsed exposure. *Environ. Sci. Technol.* **2007**, *41*, (15), 5528-5534.
- (5) Ashauer, R.; Caravatti, I.; Hintermeister, A.; Escher, B. I., Bioaccumulation kinetics of organic xenobiotic pollutants in the freshwater invertebrate *Gammarus pulex* modeled with prediction intervals. *Environ. Toxicol. Chem.* **2010**, *29*, (7), 1625-1636.
- (6) Sutcliffe, D. W.; Carrick, T. R.; Willoughby, L. G., Effects of diet, body size, age and temperature on growth rates in the amphipod *Gammarus pulex*. *Freshw. Biol.* **1981**, *11*, (2), 183-214.
- (7) Ashauer, R.; Hintermeister, A.; Potthoff, E.; Escher, B. I., Acute toxicity of organic chemicals to *Gammarus pulex* correlates with sensitivity of *Daphnia magna* across most modes of action. *Aquat. Toxicol.* **2011**, *103*, 38-45.
- (8) Ashauer, R.; Boxall, A. B. A.; Brown, C. D., New ecotoxicological model to simulate survival of aquatic invertebrates after exposure to fluctuating and sequential pulses of pesticides. *Environ. Sci. Technol.* **2007**, *41*, (4), 1480-1486.
- (9) Bluzat, R.; Seuge, J., Effects of 3 Insecticides - Carbaryl, Fenthion and Lindane - Acute Toxicity in 4 Lymnaeid Invertebrates - Chronic Toxicity in *Pulmonate Lymnea*. *Environ. Pollut.* **1979**, *18*, (1), 51-70.
- (10) Wang, W. X.; Fisher, N. S., Assimilation efficiencies of chemical contaminants in aquatic invertebrates: A synthesis. *Environ. Toxicol. Chem.* **1999**, *18*, (9), 2034-2045.
- (11) Maltby, L.; Clayton, S. A.; Wood, R. M.; McLoughlin, N., Evaluation of the *Gammarus pulex* in situ feeding assay as a biomonitor of water quality: Robustness, responsiveness, and relevance. *Environ. Toxicol. Chem.* **2002**, *21*, (2), 361-368.
